# Supplementary material for: Immobilisation of ruthenium cluster catalysts via novel derivatisations of ArgoGel resinsElectronic supplementary information (ESI) available: footnotes to the text. See http://www.rsc.org/suppdata/cc/b1/b106336g/
Source: Royal Society of Chemistry journal article supplement (doi:10.1039/b106336g), 2001-11-19
Supplement: b106336g.doc [file b106336g.doc]

# Supplementary Information (footnotes to the text)

‡ 1H-NMR (for **2** and **3**): CH2N and OCH2CH2N protons shift from ** 2.83 and 3.25 ppm to ** 3.48 and 3.95 ppm respectively upon protonation. Microanalysis (for **2**): found N 0.55% (0.39 mmol/g), Cl 1.43% (0.40 mmol/g). N:Cl ratio *ca.* 1:1. Microanalysis (for **3**): found N 0.66% (0.47 mmol/g). FTIR (for **2** and **3**): no observable NH2 asymm./symm. stretches.

§ The catalytic hydrogenations were carried out in a high-pressure stainless steel catalytic reactor lined with Poly Ether Ether Ketone (PEEK). 20 mg of the catalyst (resin **4**) was introduced into the reaction vessel containing 20 g of the substrate (cyclohexene, cyclohexanone or benzophenone) dispersed in 40 ml of THF (as a benign solvent and swelling agent). Dry hydrogen (20 bar) was pressurised into the reaction vessel and the reactor was heated to the desired temperature (353 K for cyclohexene and 373 K for cyclohexanone and benzophenone). Using a mini-robot liquid sampling valve, small aliquots of the sample were removed to study the kinetics of the reaction without perturbing the pressure in the reactor. The products were analysed (using a suitable internal standard, such as mesitylene) by gas chromatography (GC, Varian, Model 3400 CX) employing a HP-1 capillary column (25 m x 0.32 mm) and flame ionisation detector. A HP-Innowax {cross-linked polyethylene glycol, 30 m x 0.53 mm x 1.0 m (film thickness)} column was employed to separate the products from the hydrogenation of cyclohexanone and benzophenone (namely cyclohexanol and diphenylmethanol). The identity of the products was confirmed by injecting authenticated samples and further by LC-MS (Shimadzu, QP 8000) employing a gamma-cyclodextrin dialkyl column (Chiraldex, 20 m x 0.25 mm).

¶ 31P NMR (for **6**): additional peaks at ** -9 (v.w), 18.5 (v.w), 28, 29, 30, 31 ppm. These latter peaks were assigned to phosphorus oxide species. Some oxidation of the intermediate species **6** is believed to have occurred during NMR acquisition, since all reactions were carried out in an inert atmosphere and all sample handling was carried out in a glovebox.

║Single Bead FT-IR (for **7**): (CO) Ru-cluster at 2051, 2030, 1997 and 1809 cm-1. Microanalysis: found P 1.46% (0.47 mmol/g). X-EDS: shows P:Ru ratio is approximately 1:3 – in agreement with microanalysis/ICP-AES results. 31P NMR: additional peaks at ** 27 and 30 ppm were assigned to uncoordinated phosphine oxide species and the peak at ** 40 ppm was assigned to a coordinated phosphine oxide species. Gel-phase 1H HR-MAS NMR: phenyl protons shift to ** 7.55 and 7.90 ppm upon coordination of the cluster.

†† 31P NMR (for **8**): the additional peak at ** 31 ppm was assigned to phosphorus oxide. Gel-phase 1H HR-MAS NMR: two additional peaks at ** 3.83 and 2.72 ppm were assigned to the -OCH2CH2POPh2 and -CH2POPh2 protons respectively, indicating again that some oxidation had occurred during data acquisition.

‡‡Microanalysis (for **9**): found 0.92% P (0.30 mmol/g), in agreement with the microanalysis results for **8**. The 5:1 Ru:P ratio indicates that only 1 phosphorus coordinates per cluster. 31P NMR: additional peaks were observed at ** 27, 28 and 31 ppm. These were assigned to phosphorus oxide species.
